# Supplementary material
Source: PubMed Central journal article supplement (PMC3088575)
Supplement: 1016048108_pnas.201016048SI.pdf [file 1016048108_pnas.201016048SI.pdf]

# Supporting Information

Chung et al. 10.1073/pnas.1016048108

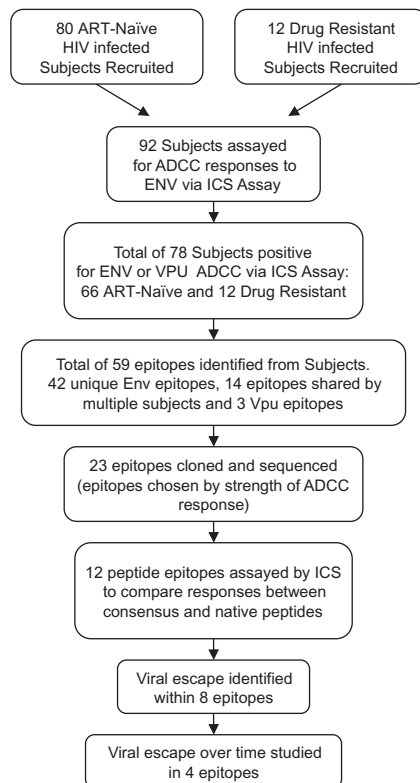

**Fig. S1.** Flowchart of experimental studies showing the identification of antibody-dependent cellular cytotoxicity (ADCC) epitopes and viral escape. ART, antiretroviral therapy; Env, HIV-1 envelope protein; ICS, intracellular cytokine staining.

### A. Clonal analysis of sequence changes during infection

|                                                  |                                                                                                                                                                                                                                                                                                                                                                                                                                 |
|--------------------------------------------------|---------------------------------------------------------------------------------------------------------------------------------------------------------------------------------------------------------------------------------------------------------------------------------------------------------------------------------------------------------------------------------------------------------------------------------|
| Initial infection                                | TEK <b>L</b> WVTVY <b>Y</b> GV <b>P</b> V <b>K</b> DA <b>T</b> TT <b>L</b> FCASDA <b>K</b> AYD <b>T</b> EA <b>H</b> N <b>V</b> W <b>A</b> THAC <b>V</b> PT <b>D</b> P <b>S</b> P <b>Q</b> E <b>I</b> V <b>L</b> EN <b>V</b> T <b>E</b> D <b>F</b> N <b>M</b> W <b>K</b> N <b>D</b> M <b>V</b> E <b>Q</b> M <b>H</b> E <b>D</b> I <b>I</b> SL <b>W</b> D <b>Q</b> SL <b>K</b> PC <b>V</b> KL <b>T</b> PL <b>C</b> VT <b>L</b> NC |
| Clones (year 2000)                               | .....N.....L.....E.....<br>.....K.....<br>.....<br>.....                                                                                                                                                                                                                                                                                                                                                                        |
| Clones after 8 years<br>of infection (year 2008) | .....N.....L.....R.DA.....<br>.....N.....L.....R.DA.....<br>.....N.....L.....R.DA.....<br>.....N.....L.....R.DA.....<br>.....N.....L.....Q.DA.....<br>.....N.....L.....Q.DA.....<br>.....N.....L.....Q.DA.....                                                                                                                                                                                                                  |

The C1 region of Env was cloned and sequenced from plasma HIV-1 RNA obtained early after initial infection (year 2000) and 8 years later.

Shaded areas represent mapped ADCC epitopes in the subject.

Bolded changes represent variants rarely ( $\leq 2\%$ ) found in 300 unique Env clones (kindly supplied by Dr B Korber, Los Alamos National Laboratory).

### B. Analysis of amino acid changes within and outside ADCC epitopes in Env C1 in multiple subjects:

|                                       |             |                               |
|---------------------------------------|-------------|-------------------------------|
| All changes within C1 ADCC epitopes   | 5 of 45 aa  |                               |
| All changes outside epitopes in C1    | 4 of 151 aa | p = 0.031 Fisher's exact test |
| Rare† changes within C1 ADCC epitopes | 4 of 45 aa  |                               |
| Rare changes outside epitopes in C1   | 2 of 151 aa | p = 0.026 Fisher's exact test |

† rare changes defined as changes rarely identified ( $\leq 2\%$ ) in 300 unique subtype B Env clones

**Fig. S2.** Amino acid changes in and around the ADCC epitope in the conserved domain 1 (C1) envelope. (A) Clonal analysis of sequence changes during infection in one subject. Five clones from the year 2000 (within 2 mo of initial infection) and seven clones from the year 2008 are shown aligned to the most common year-2000 variant. Shaded areas represent mapped ADCC epitopes in the subject. Changes shown in bold represent variants rarely ( $\leq 2\%$ ) found in 300 unique Env clones (kindly supplied by B. Korber, Los Alamos National Laboratory, Los Alamos, NM). (B) Analysis of amino acid changes within and outside ADCC epitopes in Env C1 in multiple subjects. All changes and rare changes (defined as changes identified in  $\leq 2\%$  of 300 unique subtype B Env clones) are analyzed separately.

**Table S1. Sequences of identified ADCC epitopes in Env and Vpu**

| Env peptide no.*    | Residues | Amino acid sequence         | Region <sup>†</sup> | Patient no. | NK cells secreting IFN- $\gamma$ <sup>‡</sup> (%) |
|---------------------|----------|-----------------------------|---------------------|-------------|---------------------------------------------------|
| 2                   | 5–19     | GIRRNYYQHWWGWGTM            | Signal peptide      | 89          | 0.2                                               |
|                     |          |                             |                     | 56          | 0.7                                               |
| 4                   | 13–17    | WWGWGTMMLLGLLMIC            | Signal peptide      | 89          | 0.2                                               |
|                     |          |                             |                     | 56          | 0.9                                               |
| 8–9                 | 29–47    | ATEKLWVTVYYGVVWKEA          | C1                  | 91          | 1.5                                               |
|                     |          |                             |                     | 84          | 1.6                                               |
| 9                   | 33–47    | LWVTVYYGVVWKEA              | C1                  | 61          | 1.8                                               |
|                     |          |                             |                     | 89          | 0.2                                               |
|                     |          |                             |                     | 88          | 0.4                                               |
|                     |          |                             |                     | 72          | 1.2                                               |
|                     |          |                             |                     | 56          | 1.3                                               |
| 10–11               | 37–55    | VYYGVVWKEATTLFCAS           | C1                  | 56          | 1.3                                               |
| 11                  | 41–55    | VPVWKEATTLFCAS              | C1                  | 8           | 0.3                                               |
| 12                  | 45–59    | KEATTLFCASDAKA              | C1                  | 61          | 1.3                                               |
| 13                  | 49–63    | TTLFCASDAKAYDTE             | C1                  | 1           | 0.6                                               |
| 14                  | 53–67    | CASDAKAYDTEVHNV             | C1                  | 80          | 0.9                                               |
| 14–15               | 53–71    | CASDAKAYDTEVHNVWATQ         | C1                  | 29          | 0.4                                               |
| 14–17               | 53–79    | CASDAKAYDTEVHNVWATQACVPTDPN | C1                  | 89          | 0.2                                               |
| 16                  | 61–75    | DTEVHNVWATQACVP             | C1                  | 56          | 1.5                                               |
| 19                  | 73–87    | CVPTDPNPQEVELVN             | C1                  | 56          | 0.8                                               |
| 19–20               | 73–91    | CVPTDPNPQEVELVNVNVTEN       | C1                  | 80          | 0.5                                               |
| 23                  | 89–103   | TENFNMWVKNNMVEQM            | C1                  | 91          | 1.4                                               |
|                     |          |                             |                     | 61          | 7.6                                               |
|                     |          |                             |                     | 42          | 0.4                                               |
|                     |          |                             |                     | 88          | 1.1                                               |
|                     |          |                             |                     | 72          | 0.4                                               |
| 23–24               | 89–107   | TENFNMWVKNNMVEQMHEDI        | C1                  | 84          | 5.0                                               |
| 24                  | 93–107   | NMWKNMVEQMHEDI              | C1                  | 89          | 0.3                                               |
|                     |          |                             |                     | 19          | 0.3                                               |
| 30                  | 117–131  | PCVKLTPLCVTLNCT             | C1                  | 80          | 0.5                                               |
| 49–50               | 193–211  | STSYRLISCNTSVITQACP         | V2-C2               | 61          | 1.4                                               |
| 52                  | 205–219  | VITQACPKISFEPIP             | V2-C2               | 29          | 0.8                                               |
| 53                  | 209–223  | ACPKISFEPIPIHYC             | C2                  | 19          | 0.5                                               |
| 70–71               | 277–295  | IRSENFDTNAKTIIVHLNE         | C2                  | 61          | 1.5                                               |
| 77–78               | 305–323  | NYNKRKRIHIGPGRAFYT          | V3                  | 31          | 6.7                                               |
|                     |          |                             |                     | 67          | 3.9                                               |
| 78                  | 309–323  | RKRIHIGPGRAFYT              | V3                  | 13          |                                                   |
|                     |          |                             |                     | 91          | 2.1                                               |
|                     |          |                             |                     | 8           | 0.9                                               |
|                     |          |                             |                     | 94          | 2.0                                               |
|                     |          |                             |                     | 86          | 0.2                                               |
| 78–80               | 309–331  | RKRIHIGPGRAFYTCKNIIGTIR     | V3                  | 93          | 8.3                                               |
| 79–80               | 313–331  | HIGPGRAFYTCKNIIGTIR         | V3                  | 56          | 1.0                                               |
| 80                  | 317–331  | GRAFYTCKNIIGTIR             | V3                  | 31          | 0.9                                               |
|                     |          |                             |                     | 67          | 1.2                                               |
| 87                  | 345–359  | TLRQIVSKLKEQFKN             | C3                  | 13          | 1.0                                               |
|                     |          |                             |                     | 3           | 1.3                                               |
| 94–96               | 373–395  | EIVMHSFNCGGEFFYCNTPSPLFN    | C3                  | 8           | 0.3                                               |
| 106–107             | 421–439  | KQIINMWQEVGKAMYAPPI         | C4                  | 61          | 1.7                                               |
| 137                 | 545–559  | LLSGIVQQQNLLRA              | C6                  | 36          | 0.3                                               |
| 137–138             | 545–563  | LLSGIVQQQNLLRAIEAQ          | C6                  | 61          | 0.2                                               |
|                     |          |                             |                     | 61          | 0.2                                               |
| 143                 | 569–583  | LTWVGIKQLQARVLA             | C6                  | 8           | 0.3                                               |
| 154                 | 613–627  | ASWSNKSLDDIWNM              | C6                  | 3           | 2.0                                               |
| 161                 | 641–655  | SLIYSLLEKSQTQQE             | C6                  | 3           | 1.2                                               |
| 176                 | 701–715  | AVLSIVNRVRQGYSP             | C7                  | 92          | 1.0                                               |
| 176–177             | 701–719  | AVLSIVNRVRQGYSPSLQ          | C7                  | 3           | 1.0                                               |
| 187                 | 745–759  | TSGRLVHGFLAIWV              | C7                  | 29          | 0.9                                               |
| Vpu peptide epitope | Residues | Amino acid sequence         | Region*             | Patient no. | Cells secreting IFN- $\gamma$ <sup>§</sup> (%)    |
| 3                   | 9–23     | VALVVAIIIAIVVWS             | n/a                 | 95          | 0.3                                               |
| 7                   | 25–39    | VIIIEYRKILRQRKID            | n/a                 | 95          | 0.5                                               |
| 19                  | 69–81    | EMGHHAPWVDVDDL              | n/a                 | 8           | 5.4                                               |

\*Derived from subtype B Env consensus sequence. 15-mer peptides overlapping by 11 amino acids. (supplied by the National Institutes of Health AIDS Research and Reference Reagent Program).

<sup>†</sup>There are five variable domains (V1–V5) and seven conserved domains (C1–C7).

<sup>‡</sup>The percentage of NK (CD3<sup>+</sup>CD56<sup>+</sup>) cells secreting IFN- $\gamma$  after peptide stimulation of whole blood for 5 h.

<sup>§</sup>Patients were recruited into two cohorts: Treatment-naïve patients were HIV-infected adults who never had undergone any antiretroviral drug therapy. Treated patients were HIV-infected adults who had undergone extensive antiretroviral drug therapy and who had drug-resistant HIV.

**Table S2. Comparison of consensus and subjects' native viral epitopes**

| Subject no. | Peptide*  | Sequence <sup>†</sup> | Frequency <sup>‡</sup> | Amino acid changes |
|-------------|-----------|-----------------------|------------------------|--------------------|
| 31          | Env 77–78 | NYNKRKRIHIGPGRAFYT    | Consensus              |                    |
|             |           | YN.T.RS.....FA.       | 2/3 (66%)              | 7                  |
| 31          | Env 80    | GRAFYTTKNIIGTIR       | Consensus              |                    |
|             |           | ....FA.GE...D..       | 2/3 (66%)              | 5                  |
| 8           | Env 78    | RKRIHI--GPGRAFYT      | Consensus              |                    |
|             |           | ..S.R.QR.....V.I      | 13/13 (100%)           | 6                  |
| 56          | Env 2     | GIRRNQYQHWWGWGTM      | Consensus              |                    |
|             |           | ...K.C.RL.R....       | 8/9 (89%)              | 5                  |
| 3           | Env 87    | TLRQIVSKLKEQFKN       | Consensus              |                    |
|             |           | ..K..A...R...G.       | 2/3 (66%)              | 4                  |
| 67          | Env 80    | GRAFYTTKNIIGTIR       | Consensus              |                    |
|             |           | ....A.GE...D..        | 4/7 (57%)              | 4                  |
| 67          | Env 77–78 | NYNKRKRIHIGPGRAFYT    | Consensus              |                    |
|             |           | .N.T..S.P.....A.      | 7/7 (100%)             | 5                  |
| 56          | Env 4     | WWGWGTMLLGLLMIC       | Consensus              |                    |
|             |           | L.R.....M....         | 8/9 (89%)              | 3                  |
| 8           | Env 96    | CGGEFFYCNTSPLFN       | Consensus              |                    |
|             |           | .....STQ...           | 13/13 (100%)           | 3                  |
| 72          | Env 23    | TENFNMWKNNMVEQM       | Consensus              |                    |
|             |           | ..Q.DA.....           | 3/9 (33%)              | 3                  |
| 80          | Env 19–20 | CVPTDPNPQEVELVNTEN    | Consensus              |                    |
|             |           | .....V.D...H          | 5/7 (72%)              | 3                  |
| 93          | Env 78–80 | RKRIHIGPGRAFYT        | Consensus              |                    |
|             |           | ..G.....GE...D..      | 2/2 (100%)             | 4                  |
| 84          | ENV 8–9   | ATEKLVVTVYGVVWKEA     | Consensus              |                    |
|             |           | ..A.P.....            | 3/4 (75%)              | 2                  |
| 56          | Env 19    | CVPTDPNPQEVELVN       | Consensus              |                    |
|             |           | .....V.G.             | 9/9 (100%)             | 2                  |
| 80          | Env 13–14 | TTLFCASDAKAYGTEVHNV   | Consensus              |                    |
|             |           | .....K.....           | 3/7 (43%)              | 1                  |
| 56          | Env 16    | DTEVHNVWATQACVP       | Consensus              |                    |
|             |           | .....H....            | 8/9 (89%)              | 1                  |
| 84          | Env 23–24 | TENFNMWKNNMVEQM       | Consensus              |                    |
|             |           | .....K.A...           | 4/7 (57%)              | 2                  |
| 8           | Env 94    | DTEVHNVWATQACVP       | Consensus              |                    |
|             |           | .....H....            | 8/9 (89%)              | 1                  |
| 8           | Env 143   | EIVMHSFNCGGEFFY       | Consensus              |                    |
|             |           | ...T.....             | 13/13 (100%)           | 1                  |
| 8           | Vpu 19    | LTWVGIKQLQARVLA       | Consensus              |                    |
|             |           | .....I..              | Bulk Seq               | 1                  |
| 72          | Env 9     | EMGHHPWDVDDL          | Consensus              |                    |
|             |           | .....I...             | 10/10 (100%)           | 1                  |
| 42          | Env 23    | LWVTVYGVVWKEA         | Consensus              |                    |
|             |           | .....N.               | 9/9 (100%)             | 1                  |
| 8           | Env 11    | TENFNMWKNNMVEQM       | Consensus              |                    |
|             |           | ..E.....              | 3/3 (100%)             | 1                  |
| 56          | Env 10–11 | VPVWKEATTLFCAS        | Consensus              |                    |
|             |           | .....                 | 6/6 (100%)             | 0                  |
| 56          | Env 10–11 | VYGVVWKEATTLFCAS      | Consensus              |                    |
|             |           | .....                 | 9/9 (100%)             | 0                  |

\*Peptide ADCC epitopes identified by ADCC intracellular cytokine staining (ICS) assay. Peptides derived from subtype B Env consensus sequence; 15-mer peptides overlapping by 11 amino acids (supplied by the National Institutes of Health AIDS Research and Reference Reagent Program).

<sup>†</sup>Sequence of consensus peptide epitope (top) and sequence of patients' native viral epitope obtained by extracting viral RNA from patients' plasma and bulk sequencing or cloning and sequencing across identified epitopes.

<sup>‡</sup>Frequency of clones from patients' virus with specific sequence (X/Y, where X = number of clones with each specific sequence and Y = total number of clones). Consensus identifies the sequence as HIV-1 Clade B consensus sequence across the epitope.
